# Supplementary material
Source: publisher figshare collection journal article supplement (https://brill.figshare.com/articles/dataset/_/24289216)
Supplement: Supplementary file 1 [file 1]

## Sheet: Main Sheet
Citation	year	Sensory modality: visual	auditory	Vibrotactile	Vestibular: motion platform	vestibular: leaning	other	Manipulated modality: visual	Manipulated modality: auditory	Manipulated: Vibrotactile	Manipulated: Vestibular: motion platform	Manipulated: vestibular: leaning	Manipulated: Biomechanical: walking	Manipulated modality: other	Vection direction: linear	Vection direction: circular	Vection direction: curvilinear	DOF	vection measure	Multisensory contribution to vection [from manipulated variable]	comments	full citation
Adhikari et al., 2021	2021	x										x			x		x	forward, yaw, pitch	sensation of self-motion	enhancement	Headjoystick +visusls > gamepad + visuals in flying navigational search task	Adhikari, A., Hashemian, A. M., Nguyen-Vo, T., Kruijff, E., Heyde, M. von der, & Riecke, B. E. (2021). Lean to Fly: Leaning-Based Embodied Flying can Improve Performance and User Experience in 3D Navigation. Frontiers in Virtual Reality, 2, 1–22. doi:10.3389/frvir.2021.730334
Amemiya et al. 2013 exp 1	2013	x								x					x			front-back	percevied self-motion velocity	enhancement in some conditions	visual + vibrotactile > visual-only* when visual motion is fast	Amemiya, T., K. Hirota, and Y. Ikei. 2013. “Tactile Flow on Seat Pan Modulates Perceived Forward Velocity.” Pp. 71–77 in 2013 IEEE Symposium on 3D User Interfaces (3DUI).
Amemiya et al. 2013 exp 2	2013	x								x					x			front-back	percevied self-motion velocity	no effect	Tactile apparent motion on a seat pan did not facilitate the perceived forward velocity	Amemiya, T., K. Hirota, and Y. Ikei. 2013. “Tactile Flow on Seat Pan Modulates Perceived Forward Velocity.” Pp. 71–77 in 2013 IEEE Symposium on 3D User Interfaces (3DUI).
Amemiya et al. 2016	2016	x								x					x			front-back	percevied velocity	enhancement in some conditions	visuals + vibrations > visuals-only *when visual & vibrations are fast	Amemiya, T., Hirota, K., & Ikei, Y. (2016). Tactile Apparent Motion on the Torso Modulates Perceived Forward Self-Motion Velocity. IEEE Transactions on Haptics, 9(4), 474–482. https://doi.org/10.1109/TOH.2016.2598332
Aruga et al., 2019	2019	x	x											olfactory	x			front-back	intensity	no effect	smell didn't infleunce vection :not on graph	Aruga, A., Bannai, Y., & Seno, T. (2019). Investigation of the Influence of Scent on Self-Motion Feeling by Vection. 9.
Ash et al. 2011	2011	x												active head oscillations	x			front-back	intensity	enhancement in some conditions	visuals + head movements > visuals (head stationary) * when visual display oscillation is inphase with head movements	Ash, A., Palmisano, S., & Kim, J. (2011). Vection in depth during consistent and inconsistent multisensory stimulation. Perception, 40(2), 155–174. https://doi.org/10.1068/p6837
Ash et al. 2013	2013	x											x		x			front-back	intensity	reduction	visual-only > visual + walking	Ash, A., Palmisano, S., Apthorp, D., & Allison, R. S. (2013). Vection in Depth during Treadmill Walking. Perception, 42(5), 562–576. https://doi.org/10.1068/p7449
Bles, 1981	1981	x									x		x			x		yaw	magnitude estimates of CV	no effect	visual-only = visual + motion = visual + stepping = visual + motion + stepping	Bles, W. (1981). Stepping around: Circular vection and Coriolis effects. In J. Long & A. Baddeley (Eds.), Attention and performance IX (pp. 47–61). Erlbaum, Hillsdale, NJ.
Colley et al.,2021	2021	x												tactile- forcefeedback	x		x	front-back, curves	vection strength	benefit	visual +force > visual-only	Colley, M., Jansen, P., Rukzio, E., & Gugenheimer, J. (2022). SwiVR-Car-Seat: Exploring Vehicle Motion Effects on Interaction Quality in Virtual Reality Automated Driving Using a Motorized Swivel Seat. Proceedings of the ACM on Interactive, Mobile, Wearable and Ubiquitous Technologies, 5(4), 150:1-150:26. https://doi.org/10.1145/3494968
Costes et al., 2022	2022	x												tactile- forcefeedback	x			front-back	relative motion	benefit	visual +force > visual-only	Costes, A., & Lécuyer, A. (2022). The “Kinesthetic HMD”: Inducing Self-Motion Sensations in Immersive Virtual Reality With Head-Based Force Feedback. Frontiers in Virtual Reality, 3. https://www.frontiersin.org/articles/10.3389/frvir.2022.838720
Cress et al., 1997	1997	x												electrical vestibular stimulation			x	roll	intensity	enhancement in some conditions	visuals + EVS > visuals-only*when visuals depict roll motion (not lateral) :did not include on graph	Cress, J. D., Hettinger, L. J., Cunningham, J. A., Riccio, G. E., Haas, M. W., & McMillan, G. R. (1997). Integrating vestibular displays for VE and airborne applications. IEEE Computer Graphics and Applications, 17(6), 46–52. https://doi.org/10.1109/38.626969
D'amour et al., 2017	2017	x								x				tactile- wind	x		x		intensity, duration	disadvantage	visuals-only > visuals +wind, visual-only > visual+vibrations, Visual-only > wind+vibrations	D’Amour, S., Bos, J. E., & Keshavarz, B. (2017). The efficacy of airflow and seat vibration on reducing visually induced motion sickness. Experimental Brain Research, 235, 2811–2820. https://doi.org/10.1007/s00221-017-5009-1
Danieau et al., 2012	2012	x	x											tactile - forcefeedback	x		x		strength of self-motion	benefit	visual +auditory + force > visual + auditory	Danieau, F., Fleureau, J., Cabec, A., Kerbiriou, P., Guillotel, P., Mollet, N., Christie, M., & Lécuyer, A. (2012). Framework for enhancing video viewing experience with haptic effects of motion. 2012 IEEE Haptics Symposium (HAPTICS), 541–546. https://doi.org/10.1109/HAPTIC.2012.6183844
Farkhatdinov et al., 2013	2013	x								x					x			front-back	intensity, onset latency	enhancement in some conditions	visuals + vibrations > visuals -only * when vibrations are sinusodial pattern (not pink noise)	Farkhatdinov, I., Ouarti, N., & Hayward, V. (2013). Vibrotactile inputs to the feet can modulate vection. World Haptics Conference (WHC), 2013, 677–681. https://doi.org/10.1109/WHC.2013.6548490
Feng et al., 2016	2016	x	x							x				tactile - wind	x				sesnsation of movement (1-6)	enhancement in some conditions	visuals + movement wind > visuals	Feng, M., Dey, A., & Lindeman, R. W. (2016). An initial exploration of a multi-sensory design space: Tactile support for walking in immersive virtual environments. 2016 IEEE Symposium on 3D User Interfaces (3DUI), 95–104. https://doi.org/10.1109/3DUI.2016.7460037
Freiberg et al., 2013	2013		x										x			x		yaw	intensity, convincingness	enhancement	visual + biomechanical > visual-only	Freiberg, J., Grechkin, T., & Riecke, B. E. (2013). Do walking motions enhance visually induced self-motion illusions in virtual reality? IEEE Virtual Reality.
Harrison et al., 2010	2010							x	x							x		yaw	perceveid self-motion	enhancement	visuals + auditory > auditory-only : not on graph	Harrison, W. J., Thompson, M. B., & Sanderson, P. M. (2010). Multisensory Integration With a Head-Mounted Display: Background Visual Motion and Sound Motion. Human Factors: The Journal of the Human Factors and Ergonomics Society, 52(1), 78–91. https://doi.org/10.1177/0018720810367790
Hashemian & Riecke, 2017	2017	x										x					x	front-back, lateral	intensity	no effect	visuals + joystick = visuals + navichair, visuals + real motions, visuals + swivel chair	Hashemian, A. M., & Riecke, B. E. (2017). Leaning-Based 360° Interfaces: Investigating Virtual Reality Navigation Interfaces with Leaning-Based-Translation and Full-Rotation. In S. Lackey & J. Chen (Eds.), Virtual, Augmented and Mixed Reality (VAMR 2017) (Vol. 10280, pp. 15–32). Springer. https://doi.org/10.1007/978-3-319-57987-0_2
Hashemian et al., 2020	2020	x										x					x	forward, yaw, pitch	intensity	enhancement	visuals + Headjoystick increased vection intensity compared to visuals + controller	Hashemian, A., Lotfaliei, M., Adhikari, A., Kruijff, E., & Riecke, B. E. (2020). HeadJoystick: Improving Flying in VR using a Novel Leaning-Based Interface. IEEE Transactions on Visualization and Computer Graphics, 1–18. https://doi.org/10.1109/TVCG.2020.3025084
Hashemian et al., 2021 exp 2	2021	x										x			x		x	forward, yaw	intensity	enhancement	visuals + Headjoystick > hand-held controller + visuals	Hashemian, A. M., Adhikari, A., Kruijff, E., Heyde, M. von der, & Riecke, B. E. (2021). Leaning-based interfaces improve ground-based VR locomotion in reach-the-target, follow-the-path, and racing tasks. IEEE Transaction on visualization and computer graphics TVCG, 1–22. doi:10.1109/TVCG.2021.3131422
Hashemian et al., 2021 exp 3	2021	x										x			x		x	forward, yaw	intensity	no effect	visuals + Headjoystick = hand-held controller + visuals	Hashemian, A. M., Adhikari, A., Kruijff, E., Heyde, M. von der, & Riecke, B. E. (2021). Leaning-based interfaces improve ground-based VR locomotion in reach-the-target, follow-the-path, and racing tasks. IEEE Transaction on visualization and computer graphics TVCG, 1–22. doi:10.1109/TVCG.2021.3131422
Hashemian et al., 2021 exp1	2021	x										x			x		x	forward, yaw	intensity	enhancement	visuals + Headjoystick > hand-held controller + visuals	Hashemian, A. M., Adhikari, A., Kruijff, E., Heyde, M. von der, & Riecke, B. E. (2021). Leaning-based interfaces improve ground-based VR locomotion in reach-the-target, follow-the-path, and racing tasks. IEEE Transaction on visualization and computer graphics TVCG, 1–22. doi:10.1109/TVCG.2021.3131422
Hashemian et al., 2023	2023	x										x			x		x	forward, yaw	intensity	enhancement in some conditions	Standing leaning (NaviBoard) + visuals > gamepad + visuals, but headjoystick was not.	Hashemian, A. M., Adhikari, A., Aguilar, I. A., Kruijff, E., von der Heyde, M., & Riecke, B. E. (2023). Leaning-Based Interfaces Improve Simultaneous Locomotion and Object Interaction in VR Compared to the Handheld Controller. IEEE Transactions on Visualization and Computer Graphics (accepted), 1-17.
Hayashizaki et al., 2015	2015	x								x					x			front-back	intensity	enhancement	visuals + vibrations > visual-only	Hayashizaki, T., Fujita, A., Nozawa, J., Ueda, S., Hirota, K., Ikei, Y., & Kitazaki, M. (2015). Walking Experience by Real-scene Optic Flow with Synchronized Vibrations on Feet. Proceedings of the 6th Augmented Human International Conference, 183–184. https://doi.org/10.1145/2735711.2735803
Horie et al., 2018	2018	x												tactile - skin stretch					percevied acceleration	enhancement in some conditions	skin stretch +visuals > visuals*to a certain degree	Horie, Arata, Hikaru Nagano, Masashi Konyo, and Satoshi Tadokoro. 2018. “Buttock Skin Stretch: Inducing Shear Force Perception and Acceleration Illusion on Self-Motion Perception.” Pp. 135–47 in Haptics: Science, Technology, and Applications, Lecture Notes in Computer Science, edited by D. Prattichizzo, H. Shinoda, H. Z. Tan, E. Ruffaldi, and A. Frisoli. Cham: Springer International Publishing.
Keshavarz & Hecht, 2012	2012	x							x						x	x	x	up-down, left-right	frequency of vection	no effect	visuals +auditory = visuals-only	Keshavarz, Behrang, and Heiko Hecht. 2012. “Stereoscopic Viewing Enhances Visually Induced Motion Sickness but Sound Does Not.” Presence 21(2):213–28.
Keshavarz & Hecht, 2012	2012	x							x						x	x	x	front-back, lateral	frequency	no effect	visuals + auditory= visual-only	Keshavarz, B., & Hecht, H. (2012). Visually induced motion sickness and presence in videogames: The role of sound. Proceedings of the Human Factors and Ergonomics Society Annual Meeting, 56(1), 1763–1767. https://doi.org/10.1177/1071181312561354
Keshavarz et al., 2014	2014	x							x							x		yaw	onset latency, intensity	enhancement	visual + auditory > visual -only, auditory-only	Keshavarz, B., Hettinger, L. J., Kennedy, R. S., & Campos, J. L. (2014). Demonstrating the Potential for Dynamic Auditory Stimulation to Contribute to Motion Sickness. PLoS ONE, 9(7), e101016. https://doi.org/10.1371/journal.pone.0101016
Keshavarz et al., 2014	2014	x							x							x		yaw	onset latency, intensity	enhancement	visual + auditory > visual -only, auditory-only	Keshavarz, B., Hettinger, L. J., Vena, D., & Campos, J. L. (2014). Combined effects of auditory and visual cues on the perception of vection. Experimental Brain Research, 232(3), 827–836. https://doi.org/10.1007/s00221-013-3793-9
Keshavarz et al., 2018	2018	x							x		x				x	x	x	front-back, lateral, yaw	intensity, duration	no effect/reduction	vection duration was shortest in the trimodal condition, vection intenstiy did not change across sensory conditions	Keshavarz, B., Ramkhalawansingh, R., Haycock, B., Shahab, S., & Campos, J. L. (2018). Comparing simulator sickness in younger and older adults during simulated driving under different multisensory conditions. Transportation Research Part F: Traffic Psychology and Behaviour, 54, 47–62. https://doi.org/10.1016/j.trf.2018.01.007
Kim & Palmisano, 2008	2008	x												active head oscillations	x			front-back	intensity, perceived speed	no effect	visuals +head movements = visuals	Kim, J., & Palmisano, S. (2008). Effects of active and passive viewpoint jitter on vection in depth. Brain Research Bulletin, 77(6), 335–342. https://doi.org/10.1016/j.brainresbull.2008.09.011
Kim et al.,2015	2015	x												active head oscillations	x			front-back	intensity	reduction	visuals > visuals + head movements	Kim, J., Chung, C. Y. L., Nakamura, S., Palmisano, S., & Khuu, S. K. (2015). The Oculus Rift: A cost-effective tool for studying visual-vestibular interactions in self-motion perception. Perception Science, 6, 248. https://doi.org/10.3389/fpsyg.2015.00248
Kitazaki et al., 2010	2010	x											x		x			front-back	onset latency	enhancement in some conditions	visual + biomechanical > visual-only*when direction of radial flow was opposite (backward) to direction of walking (forward)	Kitazaki, M., Onimaru, S., & Sato, T. (2010). Vection and Action are Incompatible. 22–23.
Kitazaki et al., 2016	2016	x								x					x			front-back	intensity	enhancement	viaual + vibrations > visual-only	Kitazaki, M., Hirota, K., & Ikei, Y. (2016). Minimal Virtual Reality System for Virtual Walking in a Real Scene. In S. Yamamoto (Ed.), Human Interface and the Management of Information: Information, Design and Interaction (pp. 501–510). Springer International Publishing. https://doi.org/10.1007/978-3-319-40349-6_48
Kitazaki et al., 2019	2019	x								x					x			front-back	intensity	enhancement in some conditions	visual + vibrations > visual-only *when vibrations were sync with visual	Kitazaki, M., Hamada, T., Yoshiho, K., Kondo, R., Amemiya, T., Hirota, K., & Ikei, Y. (2019). Virtual Walking Sensation by Prerecorded Oscillating Optic Flow and Synchronous Foot Vibration. I-Perception, 10(5), 2041669519882448. https://doi.org/10.1177/2041669519882448
Kitson et al., 2017	2017	x										x			x	x	x	yaw, front-back	sensation of self-motion	no effect	visuals + joystick = visuals + navichair, visuals + Muvman, visuals + head-directed, visuals + swivel chair	Kitson, A., Hashemian, A. M., Stepanova, E. R., Kruijff, E., & Riecke, B. E. (2017). Comparing Leaning-Based Motion Cueing Interfaces for Virtual Reality Locomotion. Proceedings of IEEE Symposium on 3D User Interfaces 3DUI, 73–82. https://doi.org/10.1109/3DUI.2017.7893320
Koge et al., 2015	2015	x									x				x			up-down	intensity	enhancement	visual + motion > visual-only	Koge, M., Hachisu, T., & Kajimoto, H. (2015). VisuaLift Studio: Study on motion platform using elevator. 2015 IEEE Symposium on 3D User Interfaces (3DUI), 167–168. https://doi.org/10.1109/3DUI.2015.7131753
Kooijman et al., 2023	2023	x	x							x					x		x	roll	intensity, convincingness	disadvantage	visual+audio > visual+audio+vibrations	Kooijman, L., Asadi, H., Arango, C. G., Mohamed, S., & Nahavandi, S. (2023). Investigating the influence of neck muscle vibration on illusory self-motion in virtual reality. PsyArXiv. https://doi.org/10.31234/osf.io/853ch
Kruijff et al., 2015 exp1	2015	x										x			x			front-back	intensity	no effect	visuals + sitting upright = visuals + static leaning on angle	Kruijff, Ernst, Bernhard E. Riecke, Christina Trepkowski, and A. Kitson. 2015. “Upper Body Leaning Can Affect Forward Self-Motion Perception in Virtual Environments.” Pp. 103–12 in. Los Angeles, CA, USA: ACM.
Kruijff et al., 2015 exp3	2015	x										x			x			front-back	vection realism	enhancement in some conditions	visuals + static leaning on angle > visuals + upright *at faster velocities	Kruijff, Ernst, Bernhard E. Riecke, Christina Trepkowski, and A. Kitson. 2015. “Upper Body Leaning Can Affect Forward Self-Motion Perception in Virtual Environments.” Pp. 103–12 in. Los Angeles, CA, USA: ACM.
Kruijff et al., 2015 exp4	2015	x										x			x			front-back	vection realism, intensity	no effect	visuals + dynamic leaning on angles = visuals	Kruijff, Ernst, Bernhard E. Riecke, Christina Trepkowski, and A. Kitson. 2015. “Upper Body Leaning Can Affect Forward Self-Motion Perception in Virtual Environments.” Pp. 103–12 in. Los Angeles, CA, USA: ACM.
Kruijff et al., 2016 session 2	2016	x				x			x	x							x	yaw	intensity	enhancement	visuals + leaning + audio + vibrations > visuals + leaning	Kruijff, Ernst, Alexander Marquardt, Christina Trepkowski, Robert W. Lindeman, Andre Hinkenjann, Jens Maiero, and Bernhard E. Riecke. 2016. “On Your Feet!: Enhancing Vection in Leaning-Based Interfaces through Multisensory Stimuli.” Pp. 149–58 in Proceedings of the 2016 Symposium on Spatial User Interaction. Tokyo Japan: ACM.
Kruijff et al., 2016 session 3	2016	x							x	x		x					x	yaw	intensity	enhancement	visuals + leaning + audio + vibrations > visuals + joystick	Kruijff, Ernst, Alexander Marquardt, Christina Trepkowski, Robert W. Lindeman, Andre Hinkenjann, Jens Maiero, and Bernhard E. Riecke. 2016. “On Your Feet!: Enhancing Vection in Leaning-Based Interfaces through Multisensory Stimuli.” Pp. 149–58 in Proceedings of the 2016 Symposium on Spatial User Interaction. Tokyo Japan: ACM.
Kruijff et al., 2016 session 5	2016	x							x	x									intensity	enhancement	visuals + audio + vibrations > visuals	Kruijff, Ernst, Alexander Marquardt, Christina Trepkowski, Robert W. Lindeman, Andre Hinkenjann, Jens Maiero, and Bernhard E. Riecke. 2016. “On Your Feet!: Enhancing Vection in Leaning-Based Interfaces through Multisensory Stimuli.” Pp. 149–58 in Proceedings of the 2016 Symposium on Spatial User Interaction. Tokyo Japan: ACM.
Lackner & DiZio, 1983	1983						biomechanical -stepping							sliding touch		x		yaw	compellingness	enhancement	stepping + sliding touch > stepping-only	Lackner, James, and P. Dizio. 1983. “Some Efferent and Somatosensory Influences on Body Orientation and Oculomotor Control.” Pp. 281–301 in Sensory Experience, Adaptation and Perception. Psychology Press.
Lind et al., 2016	2016	x	x			x				x					x		x	front-back, lateral	compellingness	enhancement in some conditions	visual + auditory +lean + vibrations > visual-auditory-lean * when vibrations were static	Lind, Stine, Lui Thomsen, Mie Egeberg, Niels Nilsson, Rolf Nordahl, and Stefania Serafin. 2016. “Effects of Vibrotactile Stimulation During Virtual Sandboarding.” IEEE Virtual Real. 219–20. doi: during virtual sandboarding. 2016 IEEE Virtual Reality (VR), 219–220. https://doi.org/10.1109/VR.2016.7504732.
Liu et al., 2022	2022	x										x			x		x	forward, yaw, pitch	sensation of self-motion	no effect	visuals + Headjoystick = visuals + hand controller	Liu, P., Stepanova, E. R., Kitson, A. J., Schiphorst, T., & Riecke, B. E. (2022). Virtual Transcendent Dream: Empowering People through Embodied Flying in Virtual Reality. Proceedings of the SIGCHI Conference on Human Factors in Computing Systems (pp. 1–18). Presented at the CHI Conference on Human Factors in Computing Systems, New Orleans: ACM. doi:10.1145/3491102.3517677
Luu et al., 2021	2021	x												head movements	x			front-back	intensity	no effect	visuals-only = visuals + head oscillations	Luu, W., Zangerl, B., Kalloniatis, M., Palmisano, S., & Kim, J. (2021). Vision Impairment Provides New Insight Into Self-Motion Perception. Investigative Ophthalmology & Visual Science, 62(2), 4. https://doi.org/10.1167/iovs.62.2.4
Maeda et al., 2005	2005	x												GVS	x			up-down, lateral	intensity	enhancement in some conditions	visuals + GVS > visual-only *when GVS was anti-phase: did not include on graph	Maeda, T., H. Ando, and M. Sugimoto. 2005. “Virtual Acceleration with Galvanic Vestibular Stimulation in a Virtual Reality Environment.” Pp. 289–90 in IEEE Proceedings. VR 2005. Virtual Reality, 2005.
Melcher & Henn, 1981	1981							x			x				x			yaw	onset latency	enhancement	visual + turtable motion > visual-only, turntable-only	Melcher, G. A., and V. Henn. 1981. “The Latency of Circular Vection during Different Accelerations of the Optokinetic Stimulus.” Perception & Psychophysics 30(6):552–56. doi: 10.3758/BF03202009.
Mori & Seno, 2018	2018	x												tactile - grasping	x			front-back	intensity	reduction	visual -only > visual+ grasping	Mori, Masaki, and Takeharu Seno. 2018. “Inhibition of Vection by Grasping an Object.” Experimental Brain Research 236(12):3215–21. doi: 10.1007/s00221-018-5375-3.
Murata et al., 2014	2014				x									tactile - wind	x			front-back, lateral	intensity	enhancement in some conditions	body sway + wind > sway-only * more pronounced for certain directions of wind	Murata, Kayoko, Takeharu Seno, Yoko Ozawa, and Shigeru Ichihara. 2014. “Self-Motion Perception Induced by Cutaneous Sensation Caused by Constant Wind.” Psychology 05(15):1777–82. doi: 10.4236/psych.2014.515184.
Murovec et al., 2021	2021							x	x					tactile - sliding touch		x		yaw	intensity, duration	enhancement	adding auditory and tactile increased vection	Murovec, Brandy, Julia Spaniol, Jennifer Campos, and Behrang Keshavarz. 2021. “Multisensory Effects on Illusory Self-Motion (Vection): The Role of Visual, Auditory, and Tactile Cues.” Multisensory Research 1(aop):1–22. doi: 10.1163/22134808-bja10058.
Murovec et al., 2022	2022							x	x					tactile - sliding touch		x		yaw	intensity, duration	enhancement	adding auditory and tactile increased vection	Murovec, B., Spaniol, J., Campos, J. L., & Keshavarz, B. (2022). Enhanced vection in older adults: Evidence for age-related effects in multisensory vection experiences. Perception, 1–17. https://doi.org/10.1177/03010066221113770
Nilsson et al., 2012	2012		x	x				x							x			lateral	intensity	enhancement in some conditions	visual + audiohaptic > audiohaptic * when visual was a train: not on graph	Nilsson, Niels C., Rolf Nordahl, Erik Sikström, Luca Turchet, and Stefania Serafin. 2012. “Haptically Induced Illusory Self-Motion and the Influence of Context of Motion.” Pp. 349–60 in Haptics: Perception, Devices, Mobility, and Communication, Lecture Notes in Computer Science, edited by P. Isokoski and J. Springare. Berlin, Heidelberg: Springer.
Nishimura et al., 2014	2014	x												hypobaric hypoxia	x			front-back	intensity, duration, onset latency	reduction	visuals-only > visuals + hypobaric hypoxia: did not include on graph	Nishimura, Takayuki, Takeharu Seno, Midori Motoi, and Shigeki Watanuki. 2014. “Illusory Self-Motion (Vection) May Be Inhibited by Hypobaric Hypoxia.” Aviation, Space, and Environmental Medicine 85(5):504–8. doi: 10.3357/ASEM.3812.2014.
Nordahl et al., 2012	2012	x	x							x					x			up-down	intensity, compellingness	enhancement in some conditions	visual + vibrations > visual-only *when vibrations are sawtooth pattern	Nordahl, Rolf, Niels C. Nilsson, Luca Turchet, and Stefania Serafin. 2012. “Vertical Illusory Self-Motion through Haptic Stimulation of the Feet.” Pp. 21–26 in 2012 IEEE VR Workshop on Perceptual Illusions in Virtual Environments. Costa Mesa, CA, USA: IEEE.
Ogawa et al., 2011	2011	x												tactile - wind	x			front-back	intensity, duration, onset latency	enhancement in some conditions	visual +wind >visual-only * when visual motion was expansion	Ogawa, Masaki, Takeharu Seno, Hiroyuki Ito, and Shoji Sunaga. 2011. “Consistent Wind Facilitates Vection.” I-Perception 2(8):868–868. doi: 10.1068/ic868.
Oishi et al., 2016	2016	x												tactile - pulling clothes	x			front-back	sense of movement	no effect	visual = visual + tactile	Oishi, Erika, Masahiro Koge, Sugarragchaa Khurelbaatar, and Hiroyuki Kajimoto. 2016. “Enhancement of Motion Sensation by Pulling Clothes.” Pp. 47–50 in Proceedings of the 2016 Symposium on Spatial User Interaction, SUI ’16. New York, NY, USA: Association for Computing Machinery.
Ouarti et al., 2014	2014	x												tactile - forcefeedback	x			up-down	frequency, duration	enhancement	visual + haptic > visual-only	Ouarti, Nizar, Anatole Lecuyer, and Alain Berthoz. 2014. “Haptic Motion: Improving Sensation of Self-Motion in Virtual Worlds with Force Feedback.” Pp. 167–74 in. Houston, TX, USA: IEEE.
Ramkhalawansingh et al., 2016	2016	x							x						x	x	x	front-back, lateral	intensity	no effect	visual + auditory = visual-only	Ramkhalawansingh, Robert, Behrang Keshavarz, Bruce Haycock, Saba Shahab, and Jennifer Campos. 2016. “Age Differences in Visual-Auditory Self-Motion Perception during a Simulated Driving Task.” Frontiers in Psychology 7. doi: 10.3389/fpsyg.2016.00595.
Rampendahl et al., 2019	2019	x							x						x			front-back	perceived self-motion	enhancement in some conditions	visual + auditory > visual-only * when sound was mono (not stereo or spatial)	Rampendahl, Henrik, Stefan M. Grünvogel, and Arnulph Fuhrmann. 2019. “The Inﬂuence of Diﬀerent Audio Representations on Linear Visually Induced Self-Motion.” Pp. 1–12 in Virtuelle und Erweiterte Realität - 16. Workshop der GI-Fachgruppe VR/AR. Fulda, Germany.
Riecke & Feuereissen, 2012	2012	x	x									x			x		x	front-back, lateral, yaw	intensity	enhancement in some conditions	visuals+ audio + chair motion (leaning and passive movement) > visual + audio*at lower velocties	Riecke, B. E., & Feuereissen, D. (2012). To move or not to move: Can active control and user-driven motion cueing enhance self-motion perception (“vection”) in virtual reality? Proceedings of the ACM Symposium on Applied Perception, 17–24. https://doi.org/10.1145/2338676.2338680
Riecke et al., 2005	2005		x							x						x		yaw	intensity	enhancement	auditory + vibration > auditory-only	Riecke, B. E., Västfjäll, D., & Schulte-pelkum, J. (2005, January 1). Top-Down and Multi-Modal Influences on Self-Motion Perception in Virtual Reality. Proceedings of HCI International.
Riecke et al., 2005	2005	x							x							x		yaw	convincingness, onset latency	enhancement in some conditions	visual +auditory > visual-only * when sound is spatialized (not mono)	Riecke, B. E., Schulte-Pelkum, J., Caniard, F., & Bülthoff, H. H. (2005). Influence of Auditory Cues on the visually-induced Self-Motion Illusion (Circular Vection) in Virtual Reality. 49–57. http://www0.cs.ucl.ac.uk/research/vr/Projects/Presencia/Presence2005/presence2005.pdf
Riecke et al., 2005 exp 3	2005	x								x						x		yaw	onset latency, convincingness	enhancement	visuals + vibrations > visual-only	Riecke, B. E., Schulte-Pelkum, J., Caniard, F., & Bulthoff, H. H. (2005). Towards lean and elegant self-motion simulation in virtual reality. Virtual Reality, 2005. Proceedings. VR 2005. IEEE, 131–138. http://ieeexplore.ieee.org/xpls/abs_all.jsp?arnumber=1492765
Riecke et al., 2005 exp 4	2005	x							x							x		yaw	build-up time, convincingness	enhancement	visuals + auditory > visual-only	Riecke, B. E., Schulte-Pelkum, J., Caniard, F., & Bulthoff, H. H. (2005). Towards lean and elegant self-motion simulation in virtual reality. Virtual Reality, 2005. Proceedings. VR 2005. IEEE, 131–138. http://ieeexplore.ieee.org/xpls/abs_all.jsp?arnumber=1492765
Riecke et al., 2009	2009		x							x						x		yaw	onset latency, intensity	enhancement	auditory + vibration > auditory-only	Riecke, B. E., Feuereissen, D., & Rieser, J. J. (2009). Auditory self-motion simulation is facilitated by haptic and vibrational cues suggesting the possibility of actual motion. ACM Transactions on Applied Perception, 6(3), 20:1-20:22. https://doi.org/10.1145/1577755.1577763
Riecke et al., 2009	2009	x							x							x		yaw	build-up time, convincingness	enhancement in some conditions	visual + auditory > visual-only* when sound is spatialized	Riecke, B. E., Väljamäe, A., & Schulte-Pelkum, J. (2009). Moving sounds enhance the visually-induced self-motion illusion (circular vection) in virtual reality. ACM Transactions on Applied Perception, 6(2), 1–27. https://doi.org/10.1145/1498700.1498701
Riecke et al., 2010	2010						biomechanical		x							x		yaw	intensity	enhancement in some conditions	stepping + spatialized sound > stepping + masked auditory	Riecke, B. E., Feuereissen, D., & Rieser, J. J. (2010). Spatialized sound influences biomechanical self-motion illusion (“vection”). Proceedings of the 7th Symposium on Applied Perception in Graphics and Visualization - APGV ’10, 158. https://doi.org/10.1145/1836248.1836280
Riecke et al., 2011	2011								x				x			x		yaw	intenisty, realism	enhancement	auditory + biomechanical > biomechanical-only	Riecke, B. E., Feuereissen, D., Rieser, J., & McNamara, T. (2011). Spatialized sound enhances biomechanically-induced self-motion illusion (vection). In Proceedings of the SIGCHI Conference on Human Factors in Computing Systems, (p. 2802). https://doi.org/10.1145/1978942.1979356
Riecke et al., 2015	2015							x					x			x		yaw	intensity	enhancement	visual + biomechanical > visual-only	Riecke, B. E., Freiberg, J., & Grechkin, T. Y. (2015). Can Walking Motions Improve Visually Induced Rotational Self-Motion Illusions in Virtual Reality? Journal of Vision, 15(2), 1–15. https://doi.org/10.1167/15.2.3
Riecke et al., 2016	2016	x										x			x			front-back	intensity	enhancement	visuals + seated leaning > visuals + joystick	Riecke, B. E., Trepkowski, C., & Kruijff, E. (2016). “Human Joystick”: Enhancing Self-Motion Perception (Linear Vection) by using Upper Body Leaning for Gaming and Virtual Reality. ISpaceLab Technical Report, 2016(1), 1–12.
Riecke, 2006	2006	x												vestibular (motion cueing)	x		x	front-back, lateral, yaw	intensity, duration, onset latency	enhancement	visuals + modified wheelchair > visuals + mouse, visuals + joystick	Riecke, Bernhard E. 2006. “Simple User-Generated Motion Cueing Can Enhance Self-Motion Perception (Vection) in Virtual Reality.” P. 104 in Proceedings of the ACM symposium on Virtual reality software and technology - VRST ’06. Limassol, Cyprus: ACM Press.
Rietzler et al., 2018	2018	x												tactile - forcefeedback	x			front-back	vection strength	benefit	visual + force > visual-only	Rietzler, M., Hirzle, T., Gugenheimer, J., Frommel, J., Dreja, T., & Rukzio, E. (2018). VRSpinning: Exploring the Design Space of a 1D Rotation Platform to Increase the Perception of Self-Motion in VR. Proceedings of the 2018 Designing Interactive Systems Conference, 99–108. https://doi.org/10.1145/3196709.3196755
Rupert & Kolev, 2008	2008	x								x						x		yaw	perceived velocity	reduction	Participants noted a decease in percevied velocity when tactile stimulus was applied	Rupert, A., & Kolev, O. (2008). The Use of Tactile Cues to Modify the Perception of Self-Motion. Technical Report ADA505849.
Sasaki et al., 2012	2012	x							x						x			up-down	onset latency, duration, intensity	enhancement in some conditions	visuals + auditory > visual-only * when visual motion was upward and sounds were postitive	Sasaki, K., Seno, T., Yamada, Y., & Miura, K. (2012). Emotional sounds influence vertical vection. Perception, 41(7), 875–877.
Seno et al., 2011	2011	x											x		x			up-down, lateral, front-back	intensity, onset latency, duration	enhancement in some conditions	visuals + walking > visual-only* when visual depicts expanding optic flow (but not contracting, vertical, lateral)	Seno, T., Ito, H., & Sunaga, S. (2011). Inconsistent locomotion inhibits vection. Perception, 40(6), 747.
Seno et al., 2011	2011	x												tactile - wind	x			front-back	intensity, duration, onset latency	enhancement in some conditions	visuals + wind > visual-only *when visual motion was expanding (not contracting)	Seno, T., Ogawa, M., Ito, H., & Sunaga, S. (2011). Consistent air flow to the face facilitates vection. Perception, 40(10), 1237–1240.
Seno et al., 2012	2012	x												arthrokinetic - arm movements	x			front-back	intensity, duration, onset latency	enhancement	visuals + breaststroke movements > visual-only	Seno, T., Funatsu, F., & Palmisano, S. (2012). Virtual Swimming—Breaststroke Body Movements Facilitate Vection. Multisensory Research, 1–9. https://doi.org/10.1163/22134808-00002402
Seno et al., 2012 exp2	2012	x							x						x			up-down	intensity, duration	enhancement in some conditions	visual + auditory > visual-only *when sound was descending and visual motion was downward	Seno, T., Hasuo, E., Ito, H., & Nakajima, Y. (2012). Perceptually plausible sounds facilitate visually induced self-motion perception (vection). Perception, 41(5), 577–593. https://doi.org/10.1068/p7184
Seno et al., 2018	2018	x												head movements	x			front-back	intensity	enhancement	visuals + head movements > visuals-only: did not include on graph	Seno, T., FUJII, Y., & YOSHINAGA, T. (2018). Active Control of the Direction of Self-Motion by Head Movements and Vection Strength—The Comparison between the Virtual Driver and Virtual Passenger—. The Vision Society of Japan. https://doi.org/10.24636/vision.30.2_65
Seno, 2013	2013	x							x						x			front-back	intensity	enhancement in some conditions	visual + music > visual-only *when music is fast	Seno, T. (2013). Music Modulates the Strength of Vection. Psychology, 04(07), 566–568. https://doi.org/10.4236/psych.2013.47081
Soave et al., 2020	2020	x							x	x					x			front-back	intensity	enhancement	visual-auditory-tactile > visual-only, visual-audio	Soave, F., Bryan-Kinns, N., & Farkhatdinov, I. (2020). A Preliminary Study on Full-Body Haptic Stimulation on Modulating Self-motion Perception in Virtual Reality (pp. 461–469). https://doi.org/10.1007/978-3-030-58465-8_34
Tamada et al., 2017 exp 1	2017	x								x					x			front-back	intensity, duration	no effect	visuals = visuals + vibrations	Tamada, Y., Hara, K., Fujii, Y., Seno, T., & Sato, M. (2017). EFFECTS OF FOOT-STIMULATION (VIBRATIONS AND A WATER-FLOW) ON VECTION. Proceedings of Fechner Day, 33.
Tamada et al., 2017 exp 2	2017	x												tactile - water flow on feet	x			front-back	intensity, duration	enhancement	visuals + foot water flow > visuals-only	Tamada, Y., Hara, K., Fujii, Y., Seno, T., & Sato, M. (2017). EFFECTS OF FOOT-STIMULATION (VIBRATIONS AND A WATER-FLOW) ON VECTION. Proceedings of Fechner Day, 33.
Tanahashi et al., 2015	2015							x	x							x		yaw	duration, intensity	enhancement in some conditions	visual + auditory > auditory-only * when auditory was hotizontal& visual motion was horizontal sheering pattern: not on graph	Tanahashi, S., Ashihara, K., & Ujike, H. (2015). Effects of auditory information on self-motion perception during simultaneous presentation of visual shearing motion. Frontiers in Psychology, 6, 749. https://doi.org/10.3389/fpsyg.2015.00749
Väljamäe et al., 2006	2006		x							x					x			front-back	intensity, convincingness	enhancement in some conditions	auditory + vibratactile > auditory-only * when vibrations were mechanical shakers	Väljamäe, A., Larsson, P., Västfjäll, D., & Kleiner, M. (2006). Vibrotactile enhancement of auditory induced self-motion and spatial presence. Journal of the Acoustic Engineering Society, 54(10), 954–963.
Väljamäe et al., 2009	2009		x							x						x		yaw	intensity, convincingness	no effect	vibrotactile stimuluation did not enahnce auditorily-induced vection	Väljamäe, A., Alliprandini, P. M. Z., Alais, D., & Kleiner, M. (2009). Auditory Landmarks Enhance Circular Vection in Multimodal Virtual Reality. Journal of the Audio Engineering Society, 57(3), 111–120.
van Doorn et al., 2012	2012	x												tactile - sliding touch	x			up-down, front-back	intensity, duration, onset	no effect	tactile stimuli (e.g. , the tip of a rod moved up the body) had no influence on perceived vection.	Van Doorn, G. H. V., Seno, T., & Symmons, M. (2012). The Inability of Supraliminal Tactile Stimuli to Influence Illusory Self-Motion. The Seventh International Workshop on Haptic and Audio Interaction Design, Lund, Sweden.
Weech & Troje, 2017	2017	x												GVS, BCV		x		roll, pitch, yaw	onset latency	enhancement	visuals + GVS > visual-only, visuals + BCV > visual-only: did not include on graph	Weech, S., & Troje, N. F. (2017). Vection Latency Is Reduced by Bone-Conducted Vibration and Noisy Galvanic Vestibular Stimulation. Multisensory Research, 30(1), 65–90. https://doi.org/10.1163/22134808-00002545
Wong & Frost, 1981	1981	x												vestibular - chair rotation		x		yaw	onset latency	enhancement in some conditions	visuals + chair rotation > visuals-only*when visual and chair motion were moving in opposite directions	Wong, S. C. P., & Frost, B. J. (1981). The effect of visual-vestibular conflict on the latency of steady-state visually induced subjective rotation. Perception & Psychophysics, 30(3), 228–236. https://doi.org/10.3758/BF03214278
Wright et al., 2005	2005							x			x				x			up-down	compellingness and onset latency of perceived self-motion	enhancement	The pattern of results shows that increasing levels of stimulation for both visual and inertial inputs reduces latencies	Wright, W. G., DiZio, P., & Lackner, J. (2005). Vertical linear self-motion perception during visual andinertial motion: More than weighted summation of sensory inputs. Journal of Vestibular Research - Equilibrium & Orientation, 15(4), 185–195.
Wright, 2009	2009	x									x				x			up-down, lateral	compellingness of self-motion	enhancement in some conditions	visual + vestibular > visual-only*when intertial motion is discordant	Wright, W. G. (2009). Linear vection in virtual environments can be strengthened by discordant inertial input. Engineering in Medicine and Biology Society, 2009. EMBC 2009. Annual International Conference of the IEEE, 1157–1160. http://ieeexplore.ieee.org/xpls/abs_all.jsp?arnumber=5333425
Yahata et al., 2021	2021							x						tactile- wind	x			front-back	intensity, duration, onset	enhancement in some conditions	visuals + wind > visual- only * when hot temp wind matched firey corridor visual	Yahata, R., Takeya, W., Seno, T., & Tamada, Y. (2021). Hot Wind to the Body Can Facilitate Vection Only When Participants Walk Through a Fire Corridor Virtually. Perception, 50(2), 154–164. https://doi.org/10.1177/0301006620987087
