# Supplementary material
Source: publisher figshare collection journal article supplement (https://brill.figshare.com/articles/dataset/_/24289216)
Supplement: Supplementary file 1 [file 1]

## **Beyond the Eye: Multisensory Contributions to the Sensation of Illusory Self-Motion (Vection)**

**Bernhard E. Riecke<sup>1,\*</sup>, Brandy Murovec<sup>2,4</sup>, Jennifer L. Campos<sup>2,3</sup>, and Behrang Keshavarz<sup>2,4</sup>**

<sup>1</sup> School of Interactive Arts and Technology (SIAT), Simon Fraser University Surrey, 250-13450 102nd Avenue, Surrey, BC V3T 0A3 Canada

<sup>2</sup> KITE – Toronto Rehabilitation Institute, University Health Network, 550 University Avenue, Toronto, ON M5G 2A2, Canada

<sup>3</sup> Department of Psychology, University of Toronto, Toronto, ON ON M5S 3G3, Canada

<sup>4</sup> Department of Psychology, Toronto Metropolitan University, Toronto, ON M5B 2K3, Canada

\*Corresponding author; e-mail: [ber1@sfu.ca](mailto:ber1@sfu.ca)

ORCID iDs: Riecke: 0000-0001-7974-0850; Murovec: 0000-0002-8128-3123; Campos: 0000-0002-7054-3946; Keshavarz: 0000-0002-7763-5325

**Supplementary Material**
